# Supplementary material for: High density graphene–carbon nanosphere films for capacitive energy storage
Source: Royal Society of Chemistry journal article supplement (doi:10.1039/c8ta12050a), 2019-01-01
Supplement: c8ta12050a1.pdf [file c8ta12050a1.pdf]

## Supporting Information

# HIGH DENSITY GRAPHENE-CARBON NANOSPHERES FILMS FOR CAPACITIVE ENERGY STORAGE

Noel Díez<sup>a,b\*</sup>, Mo Qiao<sup>b</sup>, Juan Luis Gómez-Urbano<sup>a</sup>, Cristina Botas<sup>a</sup>,  
Daniel Carriazo<sup>a,c\*</sup> and Maria Magdalena Titirici<sup>b</sup>.

<sup>a</sup> *CIC EnergiGUNE, Parque Tecnológico de Álava, Albert Einstein 48, 01510 Miñano, Álava, Spain*

<sup>b</sup> *School of Engineering and Materials Science and Materials Research Institute, Queen Mary University of London, London, United Kingdom*

<sup>c</sup> *IKERBASQUE, Basque Foundation for Science, 48013 Bilbao, Spain*

\*Corresponding author: noel@incar.csic.es; dcarriazo@cicenergigune.com

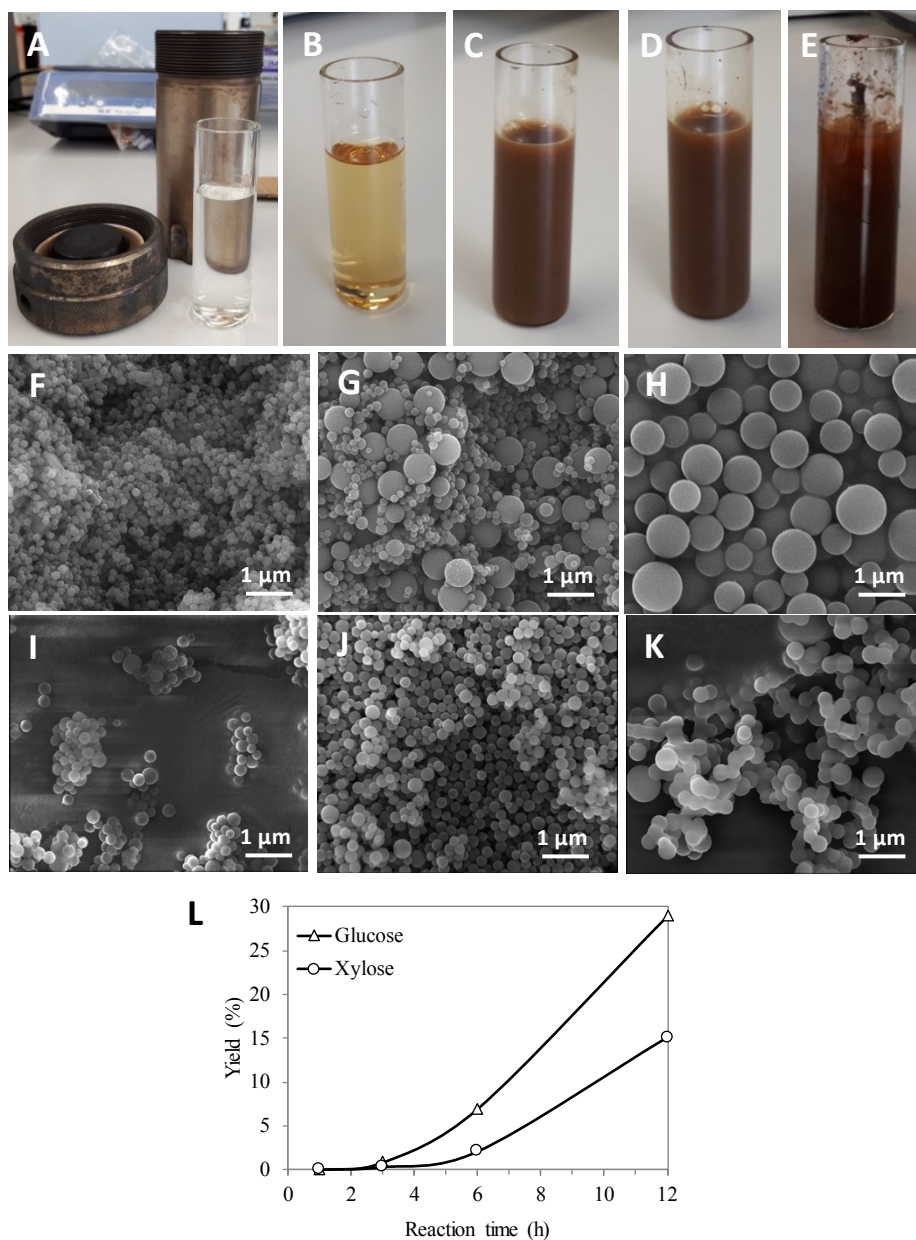

**Figure S1.** Digital images of (A) xylose solution and reaction products after (B) 1 h, (C) 3 h, (D) 6 h and (E) 12 h of hydrothermal treatment. FE-SEM images of the hydrochars obtained from xylose and glucose at different reaction times: xylose-3h (F), xylose-6h (G), xylose-12h (H), glucose-3h (I), glucose-6h (J) and glucose-12h (K). (L) Evolution of the hydrothermal reaction yields vs. reaction time with respect to the initial mass of the saccharide.

## **Supplementary Note 1:** Synthesis of the sugar-derived carbon nanospheres.

It has been previously reported that hexose sugars decompose upon hydrothermal treatment giving rise to hydroxymethylfurfural as one of the main products, which will further condensate into a carbon-like material. On the contrary, Xylose derivatives dehydrate into furfural, which condensates into carbons with more aromatic structures.<sup>1</sup> After subjecting a xylose solution (Figure S1A) to hydrothermal treatment for 1 h, a yellowish solution was obtained (**Figure S1B**) and no solid product was recovered by centrifugation. After 3 and 6 h, a brown dispersion was obtained, and longer reaction times of 12 h led to well-distinguished solid and liquid fractions (**Figure S1C-E**). Glucose-based products (not shown) had the same appearance at the same reaction times. As can be seen in **Figure S1L**, the mass yield of each hydrothermal carbonization increased with the reaction time, from 1 wt.% (3h) to 29 wt.% (12 h) in the case of glucose and from 0.3 wt.% (3h) to 15 wt.% (12h) in the case of the xylose-derived hydrochar. The morphology and particle size of the different hydrochars were observed by FE-SEM. Carbon spheres obtained from xylose after 3 h of hydrothermal treatment had a very small and uniform size of ~ 100 nm (**Figure S1F**). However, these spheres were obtained in a very low yield of 0.3 %. At a reaction time of 6 h, spheres with a bimodal size distribution were obtained (**Figure S1G**). The majority of the spheres had a very small size of 60-120 nm, and a smaller number of them had larger a size of ~ 500 nm. When reaction time was increased to 12 h, a mixture of spheres with sizes between 500 nm and 1 micron was observed (**Figure S1H**). In the case of glucose, an increase of the size of the carbon spheres with the reaction time

was analogously observed. In this case, discrete carbon spheres with a size between 150 and 250 nm were obtained after 3 and 6 h of reaction (**Fig. S1I and J**). After 12 h of reaction, the carbon spheres merged and peanut-shaped particles or agglomerated clusters were obtained instead of independent spheres (**Fig. S1K**). Carbon nanospheres prepared from xylose and glucose under hydrothermal treatment for 6 h were selected for the formulation of the composites, since they combined a small sphere size with a reasonable reaction yield.

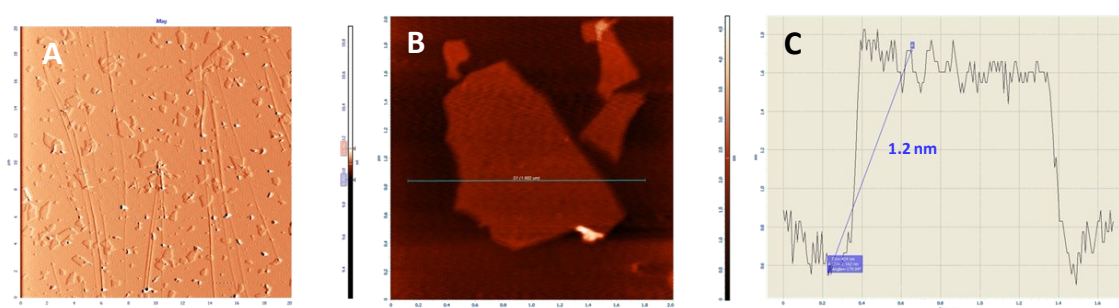

**Figure S2.** (A and B) AFM images and (C) height profile of the graphene oxide.

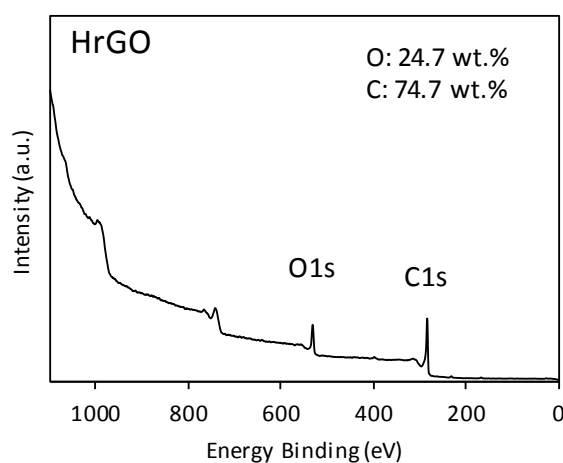

**Figure S3.** Survey XPS spectra and chemical composition of the HrGO film.

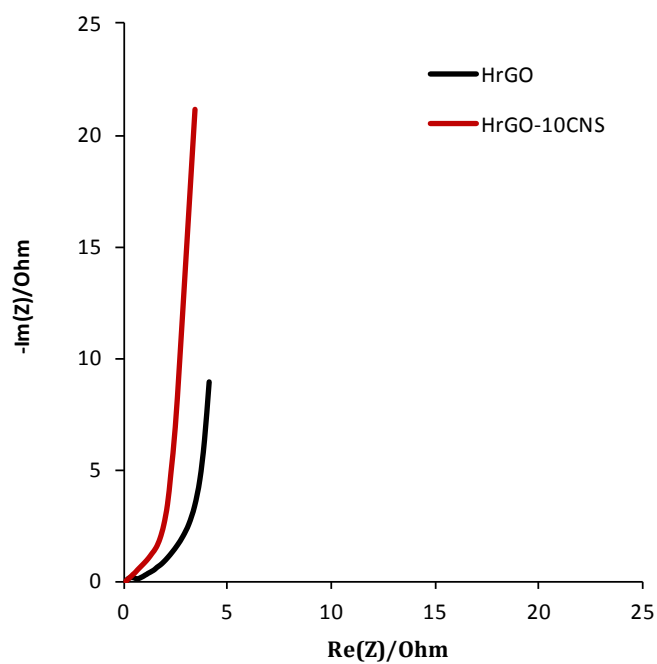

**Figure S4.** Nyquist impedance plot of symmetric supercapacitors built with HrGO and HrGO-10CNS films.

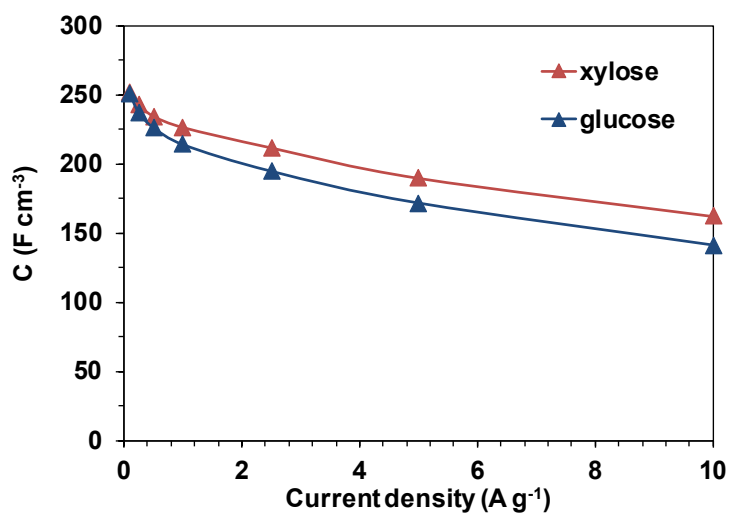

**Figure S5.** Evolution of the volumetric capacitance with the current density for HrGO-10CNS electrodes containing nanospheres derived from xylose and glucose.

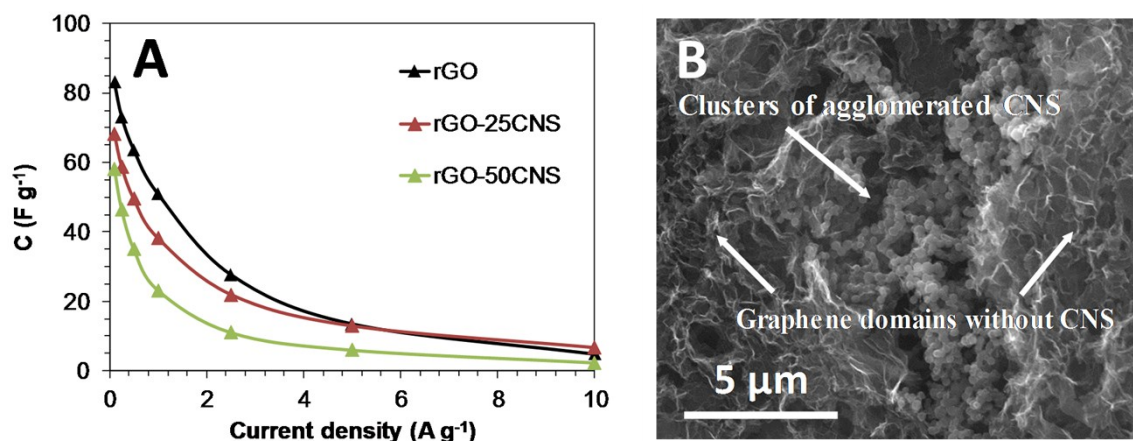

**Figure S6.** (A) Rate capability of the carbonized films containing a 25 and 50 wt.% of CNS. (B) SEM images of the rGO-25CNS film.

[1] M. M. Titirici and M. Antonietti, *Chemical Society Reviews*, 2010, **39**, 103-
